# Supplementary figures and images for: Analysis of Microbial and Nematode Communities in the Apple Replant Disease Complex
Source: Preprints.org preprint supplement (doi:10.20944/preprints202404.1081.v1), 2024-04-16

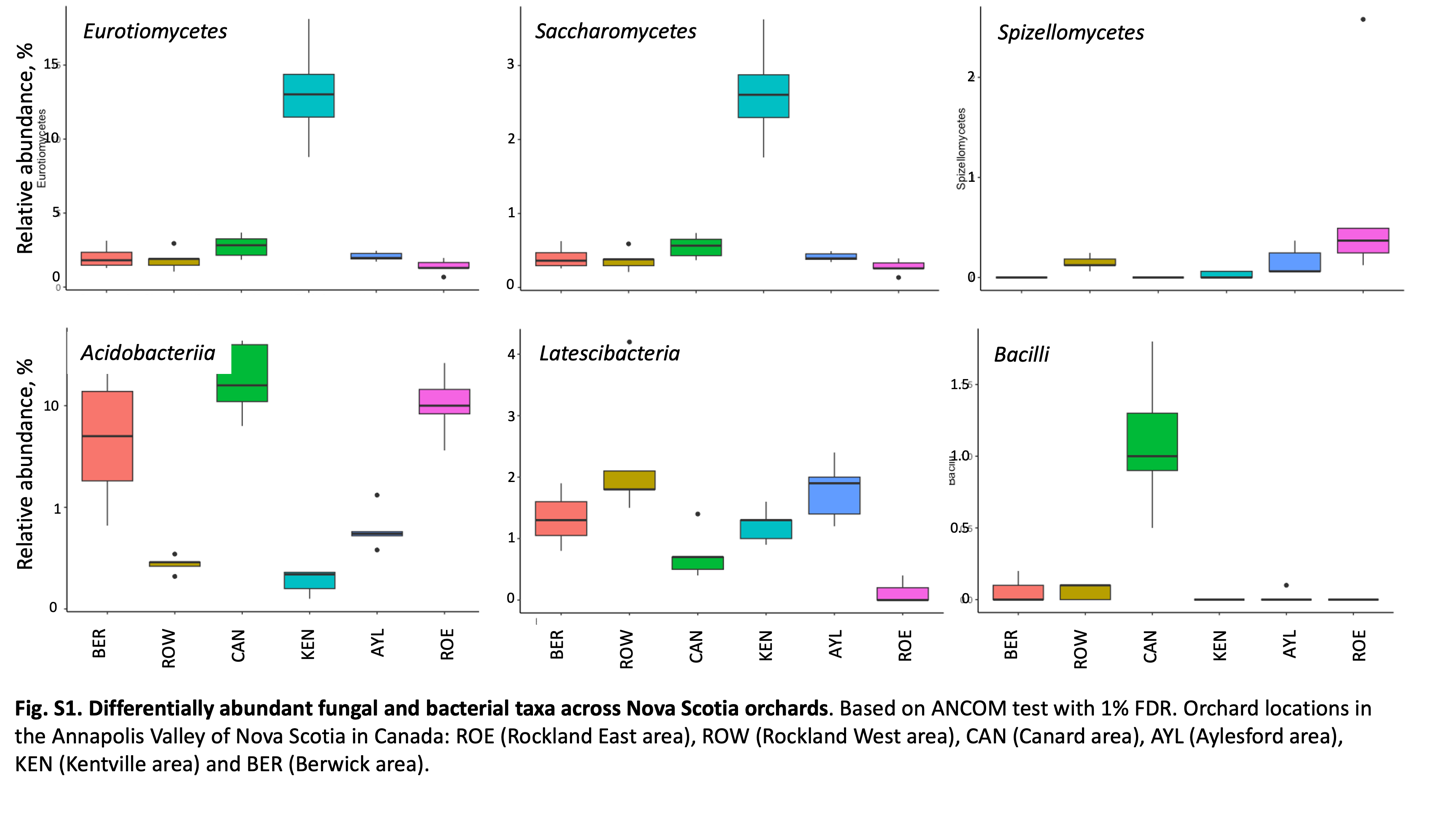


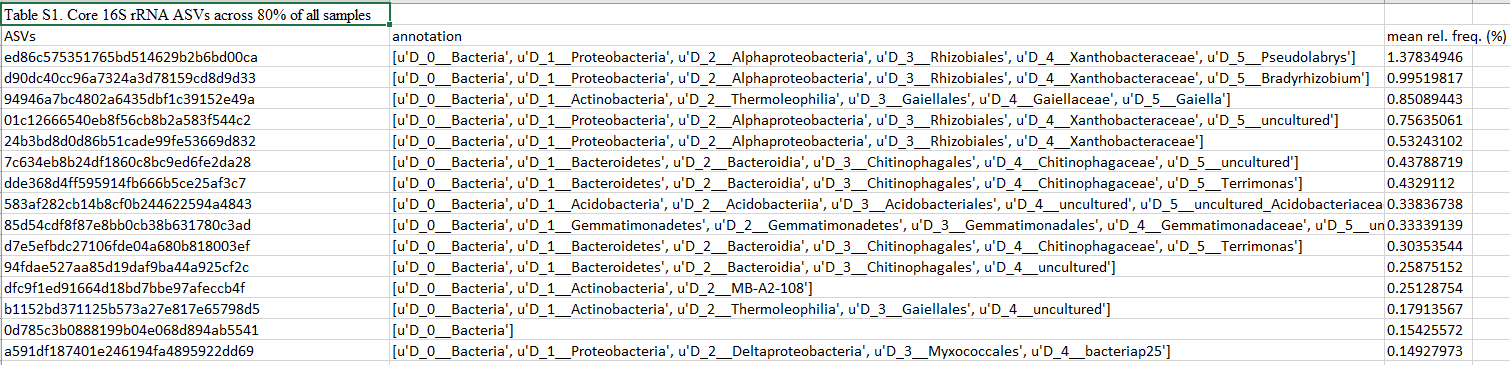


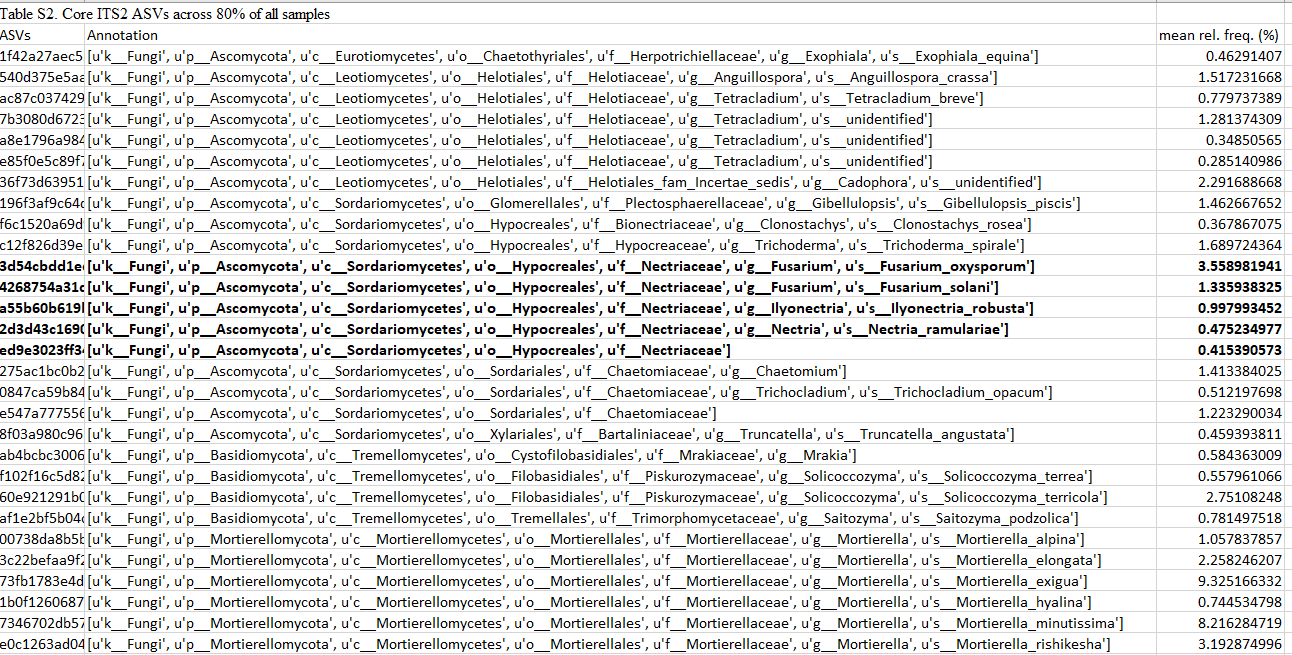

Supplement: Supplementary file 1 [file supplementary]
